# Supplementary material for: Forecasting hurricane-forced significant wave heights using a long short-term memory network in the Caribbean Sea
Source: Copernicus journal article supplement (doi:10.5194/os-18-419-2022), 2022-03-28
Supplement: Supplementary file 1 [file os-18-419-2022-supplement.pdf]

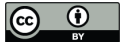

*Supplement of*

## **Forecasting hurricane-forced significant wave heights using a long short-term memory network in the Caribbean Sea**

**Brandon J. Bethel et al.**

*Correspondence to:* Changming Dong (cmdong@nuist.edu.cn)

The copyright of individual parts of the supplement might differ from the article licence.

1

### Supporting Information

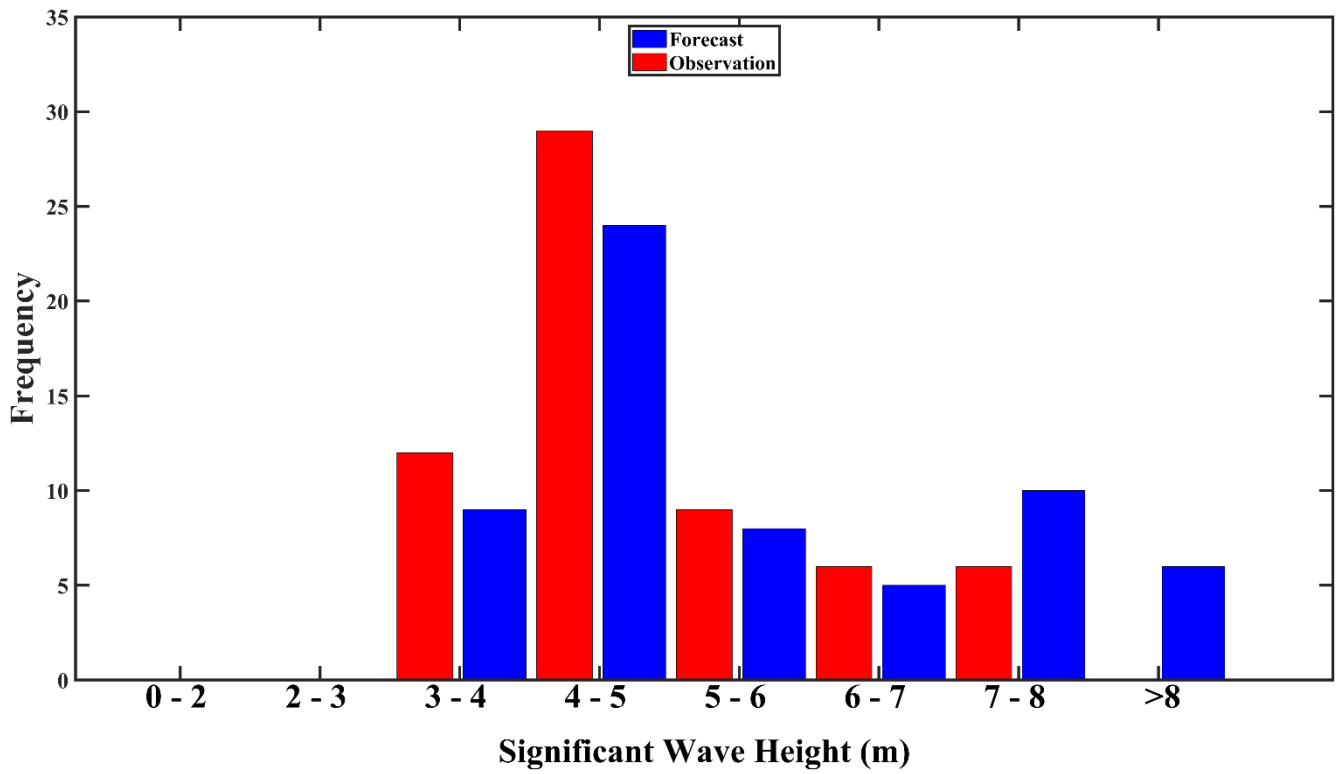

2

3 **Figure S1. Histograms of Hurricane Dorian observed (blue) vs forecasted (red) SWH (m) at the 9-hour forecast horizon.**

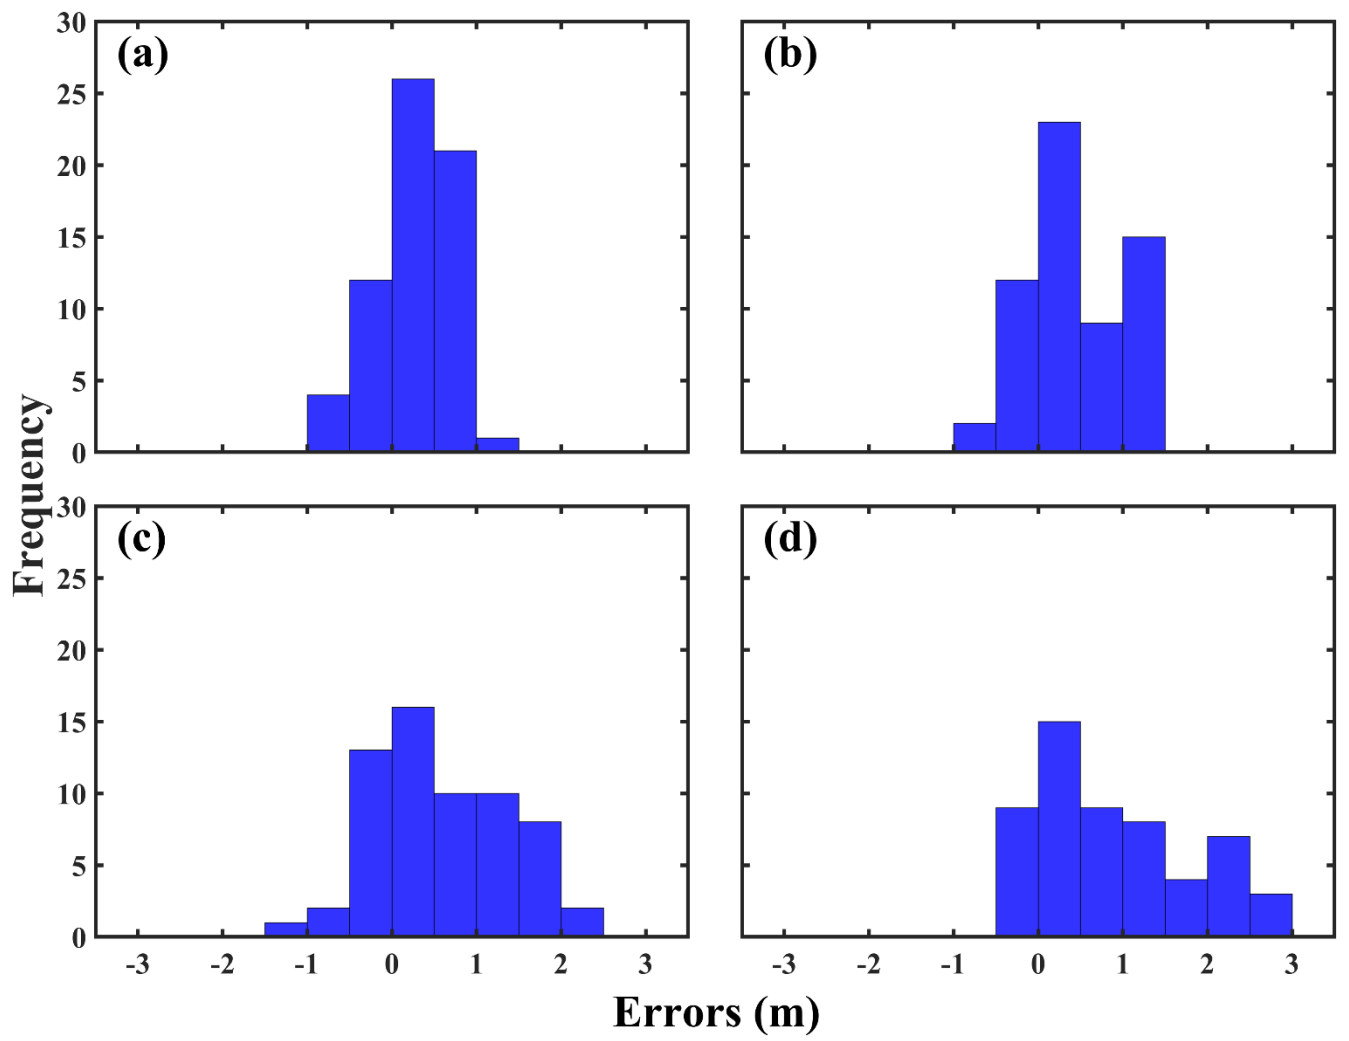

4

5 Figure S2. Histograms of Hurricane Dorian forecast errors at the (a) 3-, (b) 6-, (c) 9-, and (d) 12-hour horizons.

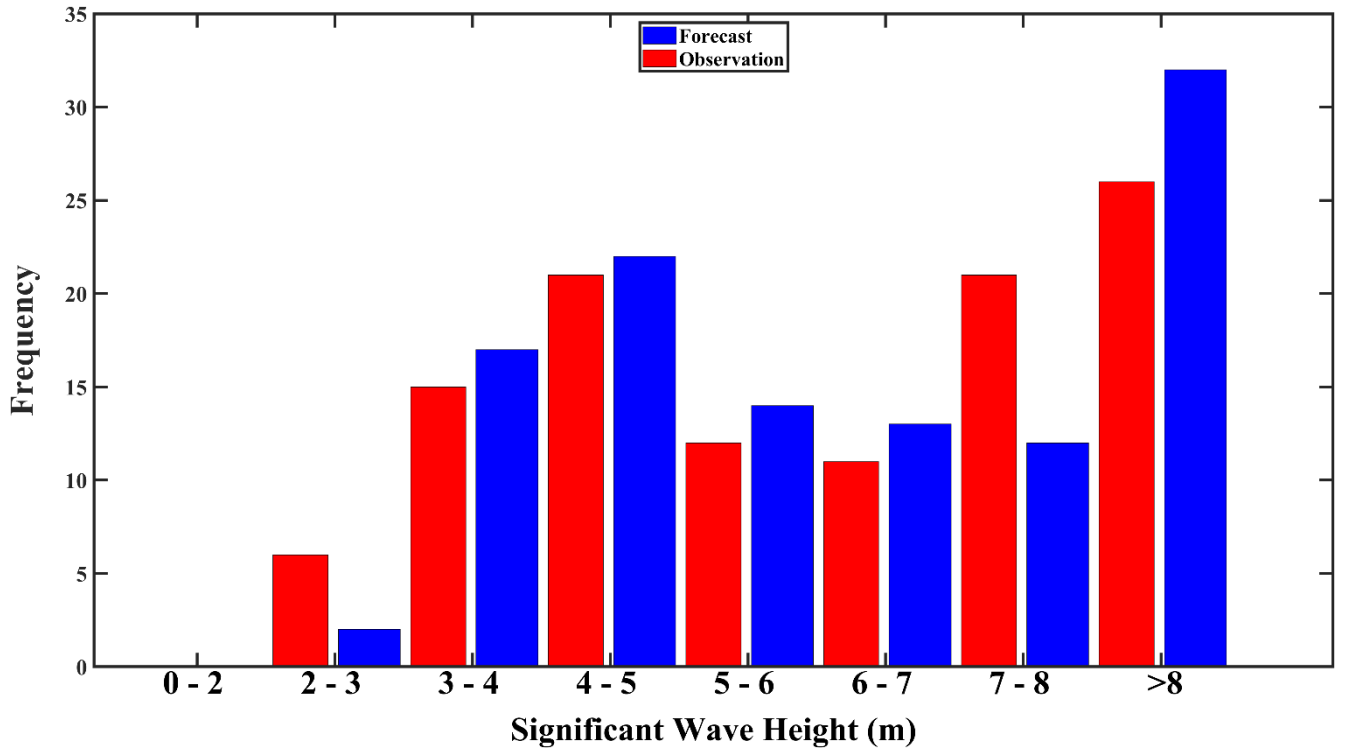

6

7 Figure S3. Same as Figure S1, but for Hurricane Sandy.

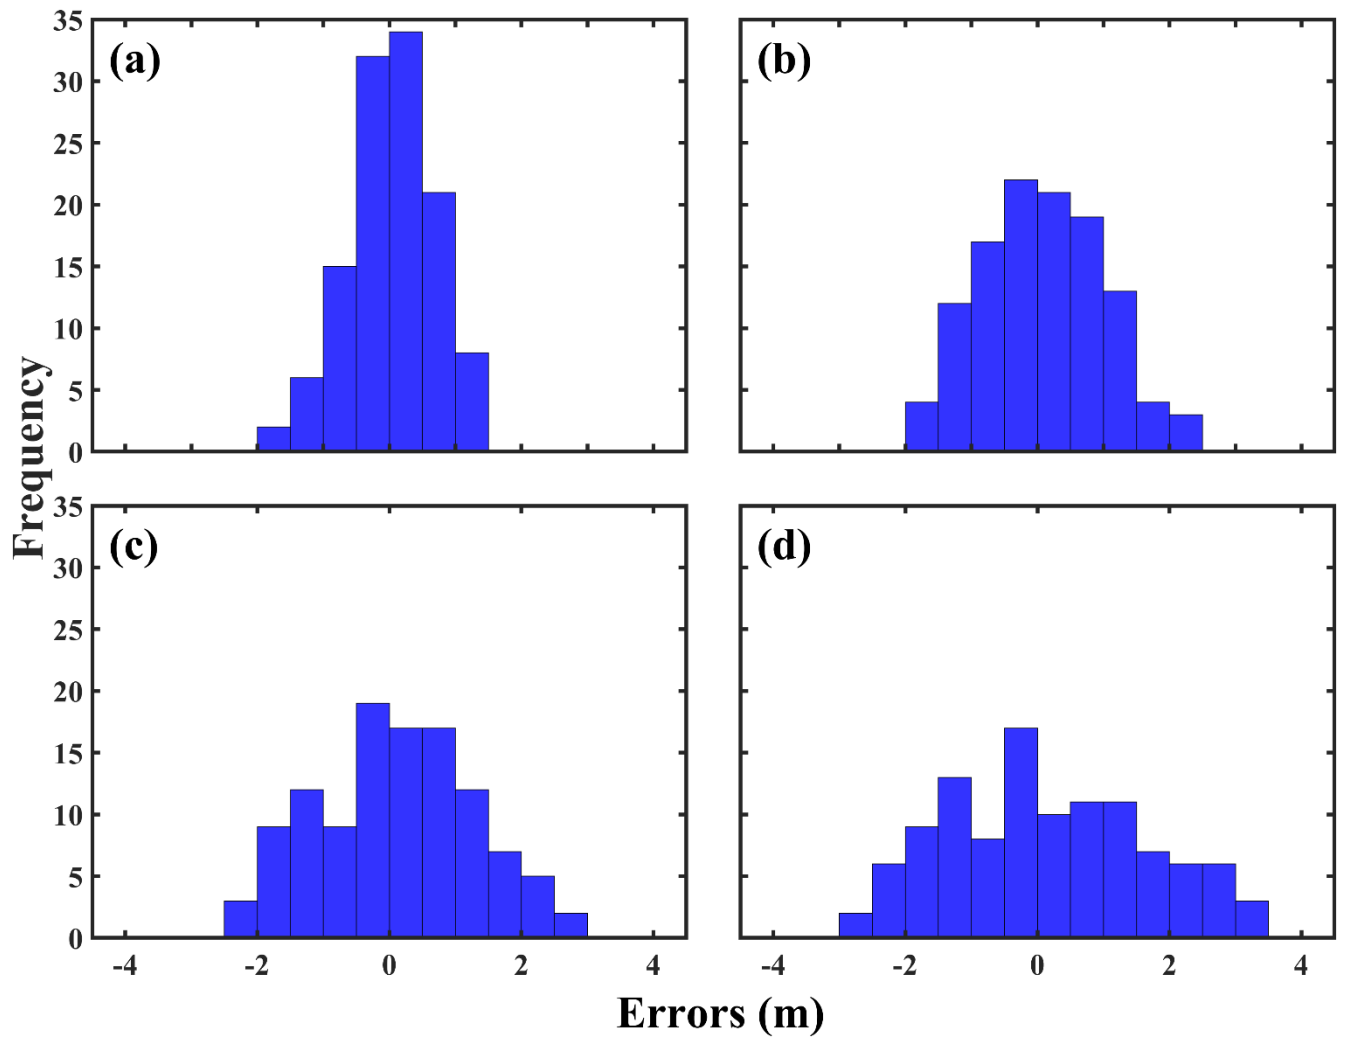

8

9 Figure S4. Same as Figure S2, but for Hurricane Sandy.

10

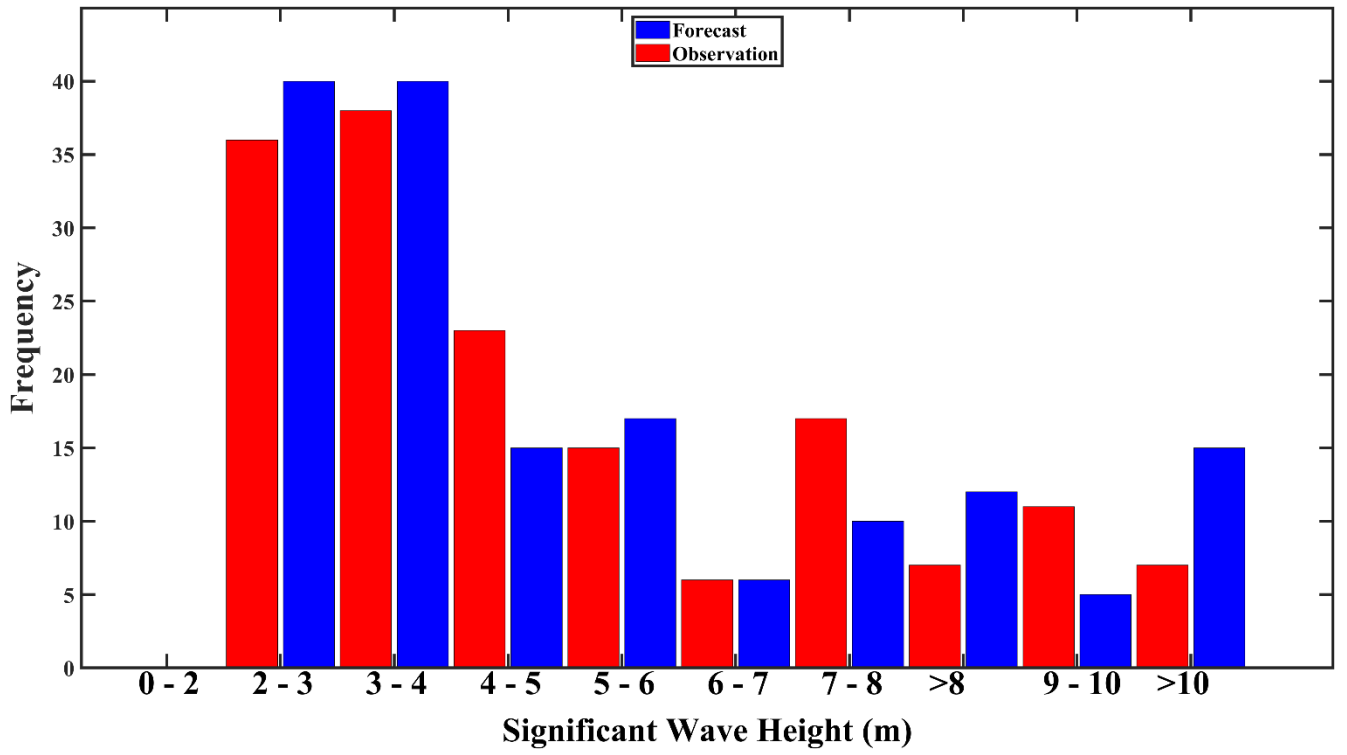

11

12 Figure S5. Same as Figure S1, but for Hurricane Igor.

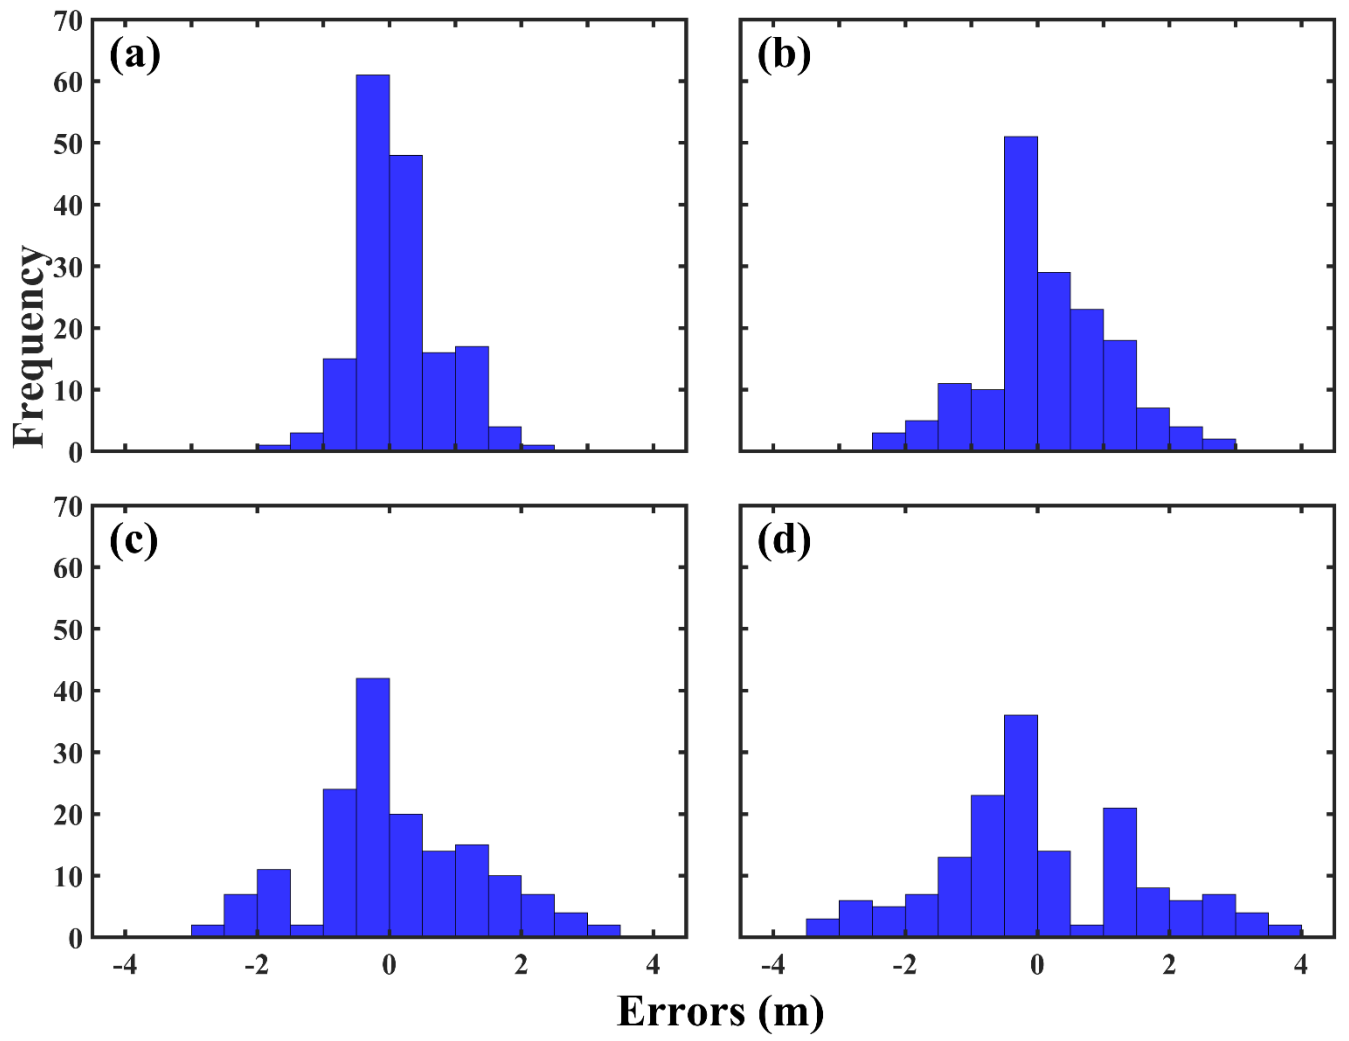

13

14 Figure S6. Same as Figure S2, but for Hurricane Igor.
